# Supplementary material for: Perception in autism does not adhere to Weber’s law
Source: eLife. 2019 Mar 4;8:e42223. doi: 10.7554/eLife.42223 (PMC6420264; doi:10.7554/eLife.42223)
Supplement: Figure 1—source data 1. [file elife-42223-fig1-data1.xlsx]

## Sheet: Exp. 1 - data supplement 2
subject_Number	group	estimation_sd.25	estimation_sd.35	estimation_sd.45	estimation_sd.55	estimation.25	estimation.35	estimation.45	estimation.55	TONI	NoChildren	NoChildrenAndTONI	filter_$	aberration.50	aberration.70	aberration.90	aberration.110	AbsAberration.50	AbsAberration.70	AbsAberration.90	AbsAberration.110	F25	F35	F45	F55	ff25	ff35	ff45	ff55	mean	est25	est35	est45	est55	Zmean	ZSco01
1405	ASD	1.13913	1.99175	3.69669	2.47398	26.3442	36.1356	44.4681	58.075	1	1	1	0	2.16667	1.55556	-1.94444	5	2.72222	3.55556	5.27778	5.44444	0.0227827	0.0284535	0.0410743	0.0224908	0.0432405	0.0551188	0.0831313	0.0425998	41.2557	0.0884722	-0.120139	-1.78764	1.81931	0.643606	0.374847
1500	ASD	4.10832	8.04366	8.84954	5.31667	23.6228	37.8469	42.6444	50.1914	1	1	1	0	-3.22222	4.94444	-5.55556	-10.6111	7.55556	13.7222	15.7778	12.6111	0.0821665	0.114909	0.0983282	0.0483333	0.173914	0.212531	0.207519	0.105928	38.5764	0.0463889	4.27056	-0.931944	-3.385	-0.119103	-0.271279
3265	ASD	5.06228	8.44815	4.85788	4.91086	23.9314	41.5503	50.3878	73.5897	1	1	1	0	-2.61111	12.2778	9.77778	35.7222	9.16667	17.6111	11	35.7222	0.101246	0.120688	0.0539764	0.0446442	0.211533	0.203323	0.0964099	0.0667329	47.3648	-8.4334	-0.814514	-1.97701	11.2249	2.38266	1.84808
12246	ASD	1.93249	4.00446	8.65919	8.07979	19.6669	30.7769	40.5964	50.0511	1	1	1	0	-11.0556	-9.05556	-9.61111	-10.8889	11.0556	10.5	11.2778	12.5556	0.0386499	0.0572066	0.0962132	0.0734527	0.098261	0.130112	0.213299	0.161431	35.2728	-0.605903	0.504097	0.323542	-0.221736	-1.05951	-1.06794
932	ASD	10.918	6.26821	9.00211	4.19624	31.6467	40.5122	54.54	64.0789	1	1	1	1	12.6667	10.2222	18	16.8889	13	11.4444	19	17.3333	0.218359	0.0895459	0.100023	0.0381476	0.344995	0.154724	0.165055	0.0654855	47.6944	-1.04778	-2.18222	1.84556	1.38444	2.4765	1.92758
1005	ASD	1.56106	2.80979	1.9976	6.01029	23.5106	34.6486	43.0933	54.8767	1	1	1	1	-3.44444	-1.38889	-4.66667	-1.33333	3.44444	3.83333	5.11111	6.44444	0.0312212	0.0401399	0.0221955	0.054639	0.0663982	0.081094	0.0463551	0.109524	39.0323	-0.521736	0.616319	-0.938958	0.844375	0.0106776	-0.161336
6545	ASD	9.31657	3.36568	3.93561	4.58607	27.27	34.4522	42.6725	54.2033	1	1	1	1	4	-1.77778	-5.5	-2.66667	12.2222	5.11111	8.05556	8	0.186331	0.0480811	0.043729	0.0416916	0.341642	0.0976911	0.0922282	0.0846087	39.6495	2.62049	-0.197292	-1.97701	-0.446181	0.18638	-0.0124906
8306	ASD	6.74255	1.70596	2.16344	2.11592	26.3442	33.1617	42.925	54.3156	1	1	1	1	2.16667	-4.33333	-5	-2.44444	8.05556	4.77778	5.33333	3.66667	0.134851	0.0243708	0.0240382	0.0192356	0.255941	0.0514436	0.0504004	0.038956	39.1866	2.15757	-1.02493	-1.2616	0.128958	0.0546032	-0.124125
8521	ASD	2.65986	4.06765	5.37024	4.514	22.3603	33.3019	41.6344	52.3236	1	1	1	1	-5.72222	-4.05556	-7.55556	-6.38889	6.5	7.61111	10.3333	9.16667	0.0531972	0.0581093	0.0596694	0.0410363	0.118955	0.122145	0.128986	0.0862707	37.4051	-0.0447917	0.896875	-0.770625	-0.0814583	-0.452538	-0.553748
9128	ASD	3.23693	9.07348	2.99013	10.81	25.0256	39.895	51.005	59.4497	1	1	1	1	-0.444444	9	11	7.72222	5.44444	17.4444	11.1111	15.9444	0.0647385	0.129621	0.0332237	0.0982725	0.129345	0.227434	0.0586242	0.181834	43.8438	-3.81826	1.05118	2.16118	0.605903	1.38036	0.998984
9332	ASD	5.95295	9.02541	8.4582	11.7967	23.0336	34.845	46.4319	55.6342	1	1	1	1	-4.38889	-1	1.94444	0.166667	11.0556	11.1111	13.9444	16.0556	0.119059	0.128934	0.09398	0.107242	0.258446	0.259016	0.182163	0.21204	39.9862	-1.95257	-0.141181	1.44576	0.647986	0.282218	0.0686981
10037	ASD	1.42719	2.19271	5.67126	1.90644	22.1639	32.9092	40.7367	51.3136	1	1	1	1	-6.11111	-4.83333	-9.33333	-8.38889	6.11111	5.16667	9.33333	8.38889	0.0285438	0.0313244	0.063014	0.0173313	0.0643925	0.0666291	0.139217	0.0371528	36.7808	0.383056	1.12833	-1.04417	-0.467222	-0.630238	-0.704285
10063	ASD	1.05362	3.02945	1.08018	7.78075	23.0617	33.2739	44.8889	52.1553	1	1	1	1	-4.33333	-4.11111	-1.11111	-6.72222	4.33333	4.44444	2	7.72222	0.0210723	0.0432779	0.012002	0.0707341	0.0456869	0.0910459	0.0240633	0.149184	38.3449	-0.283264	-0.0710417	1.54396	-1.18965	-0.184991	-0.327096
10263	ASD	7.20035	4.52091	7.43317	2.26212	24.5767	32.6006	43.5422	51.6222	1	1	1	1	-1.33333	-5.44444	-3.77778	-7.77778	9.33333	8.33333	10.4444	8	0.144007	0.0645845	0.0825908	0.0205647	0.292975	0.138676	0.170712	0.0438206	38.0854	1.49125	-0.484861	0.456806	-1.46319	-0.258866	-0.389679
11355	ASD	7.81959	2.62263	3.68766	6.26748	28.785	36.7808	50.5842	57.8225	1	1	1	1	7	2.83333	10.1667	4.5	7.77778	4.61111	10.3889	9.72222	0.156392	0.0374661	0.040974	0.0569771	0.271655	0.0713042	0.0729015	0.108392	43.4931	0.291875	-1.71229	2.09104	-0.670625	1.28053	0.914413
12336	ASD	3.47963	4.14719	5.96079	4.93853	28.1678	43.5142	57.1492	72.7761	1	1	1	1	5.77778	16.1667	23.1667	34.1111	7	16.1667	23.6111	34.1111	0.0695927	0.0592456	0.066231	0.0448957	0.123532	0.0953067	0.104302	0.0678592	50.4018	-7.23403	-1.88764	1.74736	7.37431	3.2472	2.58047
12345	ASD	2.86836	4.24285	5.92095	4.71156	20.4806	34.5083	42.3919	53.0811	1	1	1	1	-9.44444	-1.66667	-6.05556	-4.88889	9.77778	7.44444	10.6111	8	0.0573671	0.0606121	0.0657883	0.0428324	0.140053	0.122951	0.139671	0.0887616	37.6155	-2.13493	1.89285	-0.223542	0.465625	-0.39264	-0.503005
12481	ASD	8.34212	8.10312	5.75998	5.487	23.7631	35.3219	42.0553	55.0169	0	1	0	1	-2.94444	-0.0555556	-6.72222	-1.05556	11.2778	10.5	10.1667	8.16667	0.166842	0.115759	0.0639998	0.0498818	0.351054	0.229408	0.136962	0.0997328	39.0393	-0.27625	1.28264	-1.98403	0.977639	0.0126742	-0.159645
104742	ASD	5.0774	6.11912	5.85726	4.17713	29.8792	34.5083	43.4581	49.6022	1	1	1	1	9.16667	-1.66667	-3.94444	-11.7778	10.2778	9.88889	9.16667	12.5556	0.101548	0.087416	0.0650807	0.0379739	0.169931	0.177323	0.13478	0.0842125	39.3619	5.51722	0.146389	-0.903889	-4.75972	0.104519	-0.0818392
1335	ASD	3.08344	4.98489	7.57846	8.65471	22.7811	30.0756	36.4442	41.0172	1	1	1	0	-4.88889	-10.4444	-17.8333	-28.7778	6.66667	12.1111	20.8333	29.2222	0.0616688	0.0712127	0.0842052	0.0786792	0.135351	0.165745	0.207947	0.211002	32.5795	5.2016	2.49604	-1.13535	-6.56229	-1.82621	-1.71745
9511	ASD	5.86629	3.26882	4.22326	3.64081	22.0517	32.5164	46.4881	51.6503	1	1	1	0	-6.33333	-5.61111	2.05556	-7.72222	10.6667	7.27778	6.72222	9.05556	0.117326	0.0466975	0.0469251	0.0330982	0.266025	0.100529	0.0908461	0.0704896	38.1766	-1.12493	-0.660208	3.31146	-1.52632	-0.23291	-0.367691
10314	ASD	2.84619	3.62199	4.2402	6.11292	22.3883	34.9292	43.0092	56.0831	1	1	1	0	-5.66667	-0.833333	-4.83333	1.05556	5.88889	5.38889	7.72222	8.38889	0.0569238	0.0517427	0.0471133	0.055572	0.127128	0.103695	0.0985882	0.108998	39.1024	-1.7141	0.826736	-1.09326	1.98062	0.0306438	-0.144422
13008	ASD	3.78524	4.93659	3.66135	9.32806	22.1078	31.7308	47.8347	54.2314	1	1	1	0	-6.22222	-7.16667	4.72222	-2.61111	9	9.5	7.94444	16.0556	0.0757049	0.0705227	0.0406817	0.0848005	0.171218	0.155577	0.0765417	0.172005	38.9762	-1.8684	-2.24535	3.85854	0.255208	-0.00529539	-0.174868
14147	ASD	4.88022	6.70512	7.22906	5.73504	30.1597	37.3419	43.0653	57.1492	1	1	1	0	9.72222	3.94444	-4.72222	3.16667	11.0556	9.94444	12.3889	9.83333	0.0976043	0.0957874	0.0803229	0.0521368	0.161812	0.17956	0.167863	0.100352	41.929	3.23069	0.412917	-3.86375	0.220139	0.835282	0.537224
14268	ASD	1.82492	5.58455	7.48613	4.05112	20.0317	29.7669	37.4261	47.1333	1	1	1	0	-10.3333	-11.0556	-15.8889	-16.6667	10.3333	14.2778	18.8889	16.6667	0.0364984	0.0797793	0.0831792	0.0368284	0.0911017	0.187609	0.200024	0.0859503	33.5895	1.44215	1.17743	-1.1634	-1.45618	-1.5387	-1.47389
14467	ASD	6.96214	8.69913	8.61901	11.817	21.0978	35.2658	37.0333	48.5642	0	1	0	0	-8.22222	-0.166667	-16.6667	-13.8333	13.5556	11.8333	19.7778	19.1667	0.139243	0.124273	0.0957667	0.107427	0.329994	0.246673	0.232736	0.243327	35.4903	0.6075	4.77556	-3.45694	-1.92611	-0.997616	-1.01551
1348	TD	1.49004	2.20162	6.93624	1.73045	22.725	33.2178	44.0472	52.2	1	1	1	1	-5	-4.22222	-2.77778	1.72222	5.22222	5	8.77778	3.16667	0.0298008	0.0314518	0.0770693	0.0157314	0.0655683	0.0662784	0.157473	0.030671	39.1024	-1.37743	-0.884653	-0.0552083	-1.90243	0.0306438	0.457504
1526	TD	2.85802	3.92246	3.08884	2.6372	26.0075	32.6847	44.945	54.3997	1	1	1	1	1.5	-5.27778	-1	-2.27778	4.5	7.38889	5	4.38889	0.0571605	0.0560351	0.0343204	0.0239746	0.109892	0.120009	0.0687249	0.0484783	39.5092	1.49826	-1.82451	0.435764	-0.109514	0.146448	0.638879
1640	TD	2.06569	4.10721	2.91004	9.87288	23.9594	35.6025	45.3658	48.5	1	1	1	1	-2.55556	0.5	-0.166667	13.7222	3.77778	7.16667	4.72222	15.2778	0.0413138	0.0586744	0.0323338	0.0897534	0.0862162	0.115363	0.0641461	0.2	41.8519	-2.89243	-1.24938	-1.48604	-8.35187	0.813319	1.68335
1703	TD	4.08115	2.6391	5.89492	2.45114	22.0236	31.5064	39.1094	50.7525	1	1	1	1	-6.38889	-7.61111	-12.5556	-9.5	9.05556	7.72222	13.4444	10.0556	0.081623	0.0377014	0.0654991	0.0222831	0.185308	0.083764	0.150729	0.048296	35.848	1.17563	0.658403	-1.73854	-0.0954861	-0.895788	-0.993499
1737	TD	0.698246	2.18586	1.49228	2.17898	22.3042	32.4042	41.1294	48.5642	1	1	1	1	-5.83333	-5.83333	-8.55556	-13.8333	5.83333	6.72222	8.55556	13.8333	0.0139649	0.0312265	0.0165808	0.0198089	0.0313056	0.067456	0.0362824	0.0448681	36.1005	1.20368	1.30368	0.0289583	-2.53632	-0.82391	-0.880922
1830	TD	1.36633	2.02926	3.07979	2.28794	21.9394	30.2158	40.5964	50.9769	1	1	1	1	-6.55556	-10.1667	-9.61111	-9.05556	6.55556	10.1667	9.61111	9.05556	0.0273265	0.0289895	0.0342199	0.0207995	0.0622772	0.0671589	0.0758636	0.0448819	35.9322	1.00729	-0.716319	-0.335764	0.0447917	-0.871829	-0.955974
2004	TD	1.50007	3.49553	6.4808	5.07666	21.0417	33.7508	43.3739	53.3617	1	1	1	1	-8.33333	-3.16667	-4.11111	-4.33333	8.33333	6.16667	7.66667	8.11111	0.0300015	0.0499361	0.0720089	0.0461515	0.0712906	0.103569	0.149417	0.0951369	37.882	-1.84035	0.868819	0.491875	0.479653	-0.316768	-0.0866224
2110	TD	1.37272	2.38059	2.86966	3.01082	20.0597	27.8311	37.3419	48.2836	1	1	1	1	-10.2778	-14.8889	-16.0556	-14.3889	10.2778	14.8889	16.0556	14.3889	0.0274543	0.0340085	0.0318852	0.0273711	0.0684315	0.0855371	0.0768483	0.062357	33.3791	1.68062	-0.547986	-1.03715	-0.0954861	-1.5986	-2.09426
2300	TD	1.21558	2.67221	2.91161	2.31672	22.3042	32.32	42.3078	52.0711	1	1	1	1	-5.83333	-6	-6.22222	-6.88889	5.83333	6.44444	7.33333	7	0.0243117	0.0381744	0.0323513	0.0210611	0.0545003	0.0826797	0.0688198	0.0444915	37.2508	0.0534028	0.0692361	0.0570139	-0.179653	-0.496464	-0.368067
2806	TD	1.16052	2.2169	2.86094	2.55747	20.7611	30.9453	41.7747	52.6883	1	1	1	1	-8.88889	-8.72222	-7.27778	-5.66667	8.88889	8.72222	8.05556	6	0.0232103	0.03167	0.0317882	0.0232497	0.0558986	0.0716394	0.0684849	0.0485395	36.5424	-0.78125	-0.597083	0.232361	1.14597	-0.698123	-0.68391
4298	TD	1.77044	2.7083	4.63569	2.62818	25.3	27.8031	41.4942	51.2856	1	1	1	1	-12.0556	-14.9444	-7.83333	-8.44444	12.0556	14.9444	9.38889	8.44444	0.0354089	0.03869	0.0515076	0.0238926	0.07	0.0974101	0.111719	0.0512461	34.9362	5.36382	-2.13313	1.55799	1.34937	-1.15535	-1.40003
7299	TD	1.41222	1.43098	1.83494	2.02597	23.2581	34.4242	44.1594	52.3	1	1	1	1	-3.94444	-1.83333	-2.55556	1.27778	3.94444	2.94444	3.55556	3.05556	0.0282444	0.0204426	0.0203882	0.0184179	0.0607196	0.041569	0.0415526	0.0360524	39.5092	-1.25118	-0.0850694	-0.349792	-2.20924	0.146448	0.638879
8499	TD	6.88728	3.098	2.94024	3.02243	23.23	33.8911	45.1414	51.5381	1	1	1	1	-4	-2.88889	-0.611111	-7.94444	9.55556	5.55556	4.83333	7.94444	0.137746	0.0442572	0.0326693	0.0274766	0.296482	0.0914104	0.065134	0.0586446	38.4501	-0.220139	0.440972	1.69125	-1.91208	-0.155042	0.166678
9515	TD	1.52542	3.86337	7.41032	5.57738	22.1078	34.8169	46.2075	44.5	1	1	1	1	-6.22222	-1.05556	1.5	4.72222	6.33333	5.94444	9.27778	9.5	0.0305083	0.055191	0.0823369	0.0507035	0.0689991	0.110962	0.160371	0.13	40.2667	-3.15896	-0.449792	0.940764	-10.7667	0.362083	0.976613
14120	TD	4.07625	6.60215	5.40859	5.50701	23.8753	31.2	45.6183	48.6203	1	1	1	1	-2.72222	-0.277778	0.333333	-13.7222	6.27778	9.27778	9.33333	14.0556	0.081525	0.0943165	0.0600955	0.0500637	0.170731	0.21	0.118562	0.113266	38.3309	0.544375	-2.1309	2.28743	-4.71063	-0.188985	0.113516
16920	TD	1.49144	3.30269	5.75854	2.63578	23.2	35.2378	44.1875	42.6	1	1	1	1	-7.61111	-0.222222	-2.5	3.77778	7.61111	5.33333	6.94444	5.33333	0.0298287	0.0471812	0.0639837	0.0239617	0.0696725	0.0937257	0.130321	0.0458734	39.5724	-1.37236	0.665417	-0.384861	-11.9724	0.164417	0.667024
20007	TD	1.45838	4.62804	3.86639	2.25104	21.6589	32.3761	44.2	55.4939	1	1	1	1	-7.11111	-5.88889	1.5	-0.111111	7.11111	7.77778	6.16667	3.66667	0.0291676	0.0661149	0.0429599	0.020464	0.0673341	0.142946	0.09	0.0405637	38.9341	-2.27521	-1.55799	0.265903	1.55979	-0.0172751	0.382452
23900	TD	2.67719	2.88415	4.87851	3.53488	25.6989	36.4442	45.0292	59.6181	1	1	1	1	0.888889	2.16667	-0.833333	8.05556	4.55556	4.94444	7.5	9.27778	0.0535439	0.0412021	0.0542056	0.0321353	0.104175	0.0791388	0.108341	0.0592921	41.6976	-0.998681	-0.253403	-1.6684	2.92049	0.769394	1.61455
31098	TD	1.65739	1.7796	6.72522	2.87764	22.3322	35.2378	41.2	52.1	1	1	1	1	-5.77778	-0.222222	0.0555556	3	5.77778	3	7.83333	4.44444	0.0331478	0.0254229	0.0747247	0.0261604	0.0742151	0.0505026	0.16	0.06	40.0283	-2.69604	0.209514	-3.82826	-2.92826	0.294198	0.870289
231098	TD	1.53956	4.97887	3.50731	4.16274	22.3883	32.0956	39.7267	51.3978	1	1	1	1	-5.66667	-6.44444	-11.3333	-8.22222	5.66667	9.77778	11.4444	9.77778	0.0307911	0.0711266	0.0389701	0.037843	0.068766	0.155126	0.088286	0.0809906	36.4021	0.98625	0.693472	-1.67542	-0.00430556	-0.738055	-0.746454
1824	child	2.44484	3.73169	4.39529	8.34846	22.4444	33.0214	43.4861	50.1633	1	0	0	0	-5.55556	-4.61111	-3.88889	-10.6667	6	7.05556	8.11111	13.2222	0.0958762	0.105118	0.0965997	0.150423	0.108929	0.113008	0.101073	0.166426	37.2788	0.165625	0.742569	1.20729	-2.11549	#NULL!	#NULL!
10404	child	8.41865	8.06741	7.17769	10.5891	27.5506	33.0494	39.6986	51.9308	1	0	0	0	4.55556	-4.55556	-11.3889	-7.16667	11.1111	12.7778	13.0556	16.0556	0.330143	0.227251	0.157751	0.190794	0.305571	0.244101	0.180805	0.203907	38.0574	4.49319	-0.00791667	-3.35875	-1.12653	#NULL!	#NULL!
15301	child	5.44055	6.87978	3.16941	4.56932	36.9772	40.5122	37.7347	40.8489	1	0	0	0	23.2222	10.2222	-15.2778	-29.1111	24.3333	11.5556	15.3889	29.1111	0.213355	0.193796	0.0696573	0.0823301	0.147132	0.16982	0.0839918	0.111859	39.0183	12.959	6.49396	-6.28354	-13.1694	#NULL!	#NULL!
16302	child	4.15161	7.29813	8.48668	4.50624	22.6969	34.0875	42.3078	47.3297	1	0	0	0	-5.05556	-2.5	-6.22222	-16.2778	8.72222	11.0556	13.2222	16.2778	0.162808	0.205581	0.18652	0.0811934	0.182915	0.2141	0.200594	0.0952094	36.6055	1.09146	2.48201	0.702292	-4.27576	#NULL!	#NULL!
17003	child	5.60541	4.24216	5.39192	8.82167	26.5125	32.9653	42.7567	45.8147	1	0	0	0	2.5	-4.72222	-5.33333	-19.2778	8.38889	7.83333	9.77778	19.3889	0.21982	0.119497	0.118504	0.158949	0.211425	0.128686	0.126107	0.192551	37.0123	4.50021	0.952986	0.744375	-6.19757	#NULL!	#NULL!
17306	child	2.76057	5.32818	7.68608	4.42562	22.3883	39.6144	46.2917	53.1653	1	0	0	0	-5.66667	8.44444	1.66667	-4.72222	7	10.7778	11.7778	7.38889	0.108258	0.150089	0.168925	0.0797408	0.123304	0.134501	0.166036	0.0832426	40.3649	-2.9766	4.24951	0.926736	-2.19965	#NULL!	#NULL!
18002	child	3.61876	3.91512	7.40622	5.84644	23.7069	35.4061	45.1694	52.7725	1	0	0	0	-3.05556	0.111111	-0.555556	-5.5	6.16667	6.11111	10	11.3889	0.141912	0.110285	0.162774	0.105341	0.152646	0.110578	0.163965	0.110786	39.2638	-0.556806	1.14236	0.905694	-1.49125	#NULL!	#NULL!
18005	child	5.56145	8.73909	10.3639	10.0072	28.3361	42.8969	47.975	55.6903	1	0	0	0	6.11111	14.9444	5	0.277778	10	18.1667	16.4444	15.9444	0.218096	0.246171	0.227778	0.18031	0.196267	0.203723	0.216027	0.179694	43.7246	-0.388472	4.17236	-0.749583	-3.03431	#NULL!	#NULL!
18074	child	3.10566	5.7455	8.26947	9.74625	24.2681	33.9192	51.2575	67.3333	1	0	0	0	-1.94444	-2.83333	11.5	23.3333	5.27778	10.1667	15.8333	25.5556	0.121791	0.161845	0.181747	0.175608	0.127973	0.169388	0.161332	0.144746	44.1945	-4.92646	-5.27535	2.06299	8.13882	#NULL!	#NULL!
18301	child	3.77863	5.14199	6.78168	8.15679	23.6789	35.0975	48.5361	50.8928	1	0	0	0	-3.11111	-0.5	6.11111	-9.22222	7.11111	7.16667	11.8889	10.2222	0.148182	0.144845	0.149048	0.146969	0.159578	0.146506	0.139724	0.160274	39.5513	-0.872431	0.546181	3.98479	-3.65854	#NULL!	#NULL!
18303	child	10.6046	8.00565	8.75809	10.217	27.5225	35.0414	38.9972	44.6925	1	0	0	0	4.5	-0.611111	-12.7778	-21.5	12.3889	11.3889	16.8889	21.6111	0.415868	0.225511	0.192486	0.184091	0.385308	0.228463	0.224582	0.228607	36.5634	5.9591	3.47799	-2.56618	-6.8709	#NULL!	#NULL!
18305	child	7.30133	4.15913	9.23409	7.0365	23.5947	34.4522	46.965	52.4358	1	0	0	0	-3.27778	-1.77778	3	-6.16667	10.0556	6.55556	13.8889	12.1667	0.286327	0.117159	0.202947	0.126784	0.309448	0.120722	0.196616	0.134193	39.3619	-0.767222	0.0902778	2.60306	-1.92611	#NULL!	#NULL!
18457	child	3.51395	4.16794	4.35108	9.2171	28.3922	39.2217	44.6083	54.6522	1	0	0	0	6.22222	7.66667	-1.66667	-1.77778	6.66667	9.33333	7.44444	9.33333	0.137802	0.117407	0.095628	0.166074	0.123765	0.106266	0.0975395	0.16865	41.7186	1.67361	2.50306	-2.11028	-2.06639	#NULL!	#NULL!
19002	child	2.66596	6.9951	6.78076	5.28956	22.1639	37.8189	41.8869	48.0872	1	0	0	0	-6.11111	4.88889	-7.05556	-14.7778	7.44444	11.8889	11.1667	14.7778	0.104548	0.197045	0.149028	0.0953073	0.120284	0.184963	0.161882	0.109999	37.4892	-0.325347	5.32965	-0.602292	-4.40201	#NULL!	#NULL!
21004	child	2.86	7.53457	5.05734	8.71918	30.0475	33.5264	44.4119	55.6061	1	0	0	0	9.5	-3.61111	-2.05556	0.111111	18.1667	12.3889	8.61111	12.4444	0.112157	0.212241	0.11115	0.157102	0.0951826	0.224735	0.113873	0.156803	40.898	4.14951	-2.3716	-1.48604	-0.291875	#NULL!	#NULL!
91281	child	7.66371	6.53746	8.07051	8.29297	26.6528	33.8069	46.9089	54.7644	1	0	0	0	2.77778	-3.05556	2.88889	-1.55556	12.2222	10.7222	11.7778	12.6667	0.300538	0.184154	0.177374	0.149423	0.287539	0.193376	0.172046	0.15143	40.5333	1.11951	-1.72632	1.37562	-0.768819	#NULL!	#NULL!
204803	child	5.74172	7.16485	7.85447	8.14436	25.3903	37.5383	45.2256	51.3697	1	0	0	0	0.277778	4.33333	-0.444444	-8.27778	9.38889	11.1111	12.1111	15.1667	0.225166	0.201827	0.172626	0.146745	0.226139	0.190867	0.173673	0.158544	39.881	0.509306	2.65736	0.344583	-3.51125	#NULL!	#NULL!
