# Supplementary material for: Perception in autism does not adhere to Weber’s law
Source: eLife journal article supplement (doi:10.7554/elife.42223), 2019-03-04
Supplement: supp [file elife_poa_e42223_Figure_2_figure_supplement_2.docx]

Figure 2 – figure supplement 2. Individual Psychometric functions for the ASD group.
